# Supplementary material for: An animal derivative-free medium enhances Lactobacillus johnsonii LJO02 supernatant selective efficacy against the methicillin (oxacillin)-resistant Staphylococcus aureus virulence through key-metabolites
Source: PubMed Central journal article supplement (PMC9126979; doi:10.1038/s41598-022-12718-z), 2022-05-23
Supplement: 41598_2022_12718_MOESM1_ESM.pdf [file 41598_2022_12718_MOESM1_ESM.pdf]

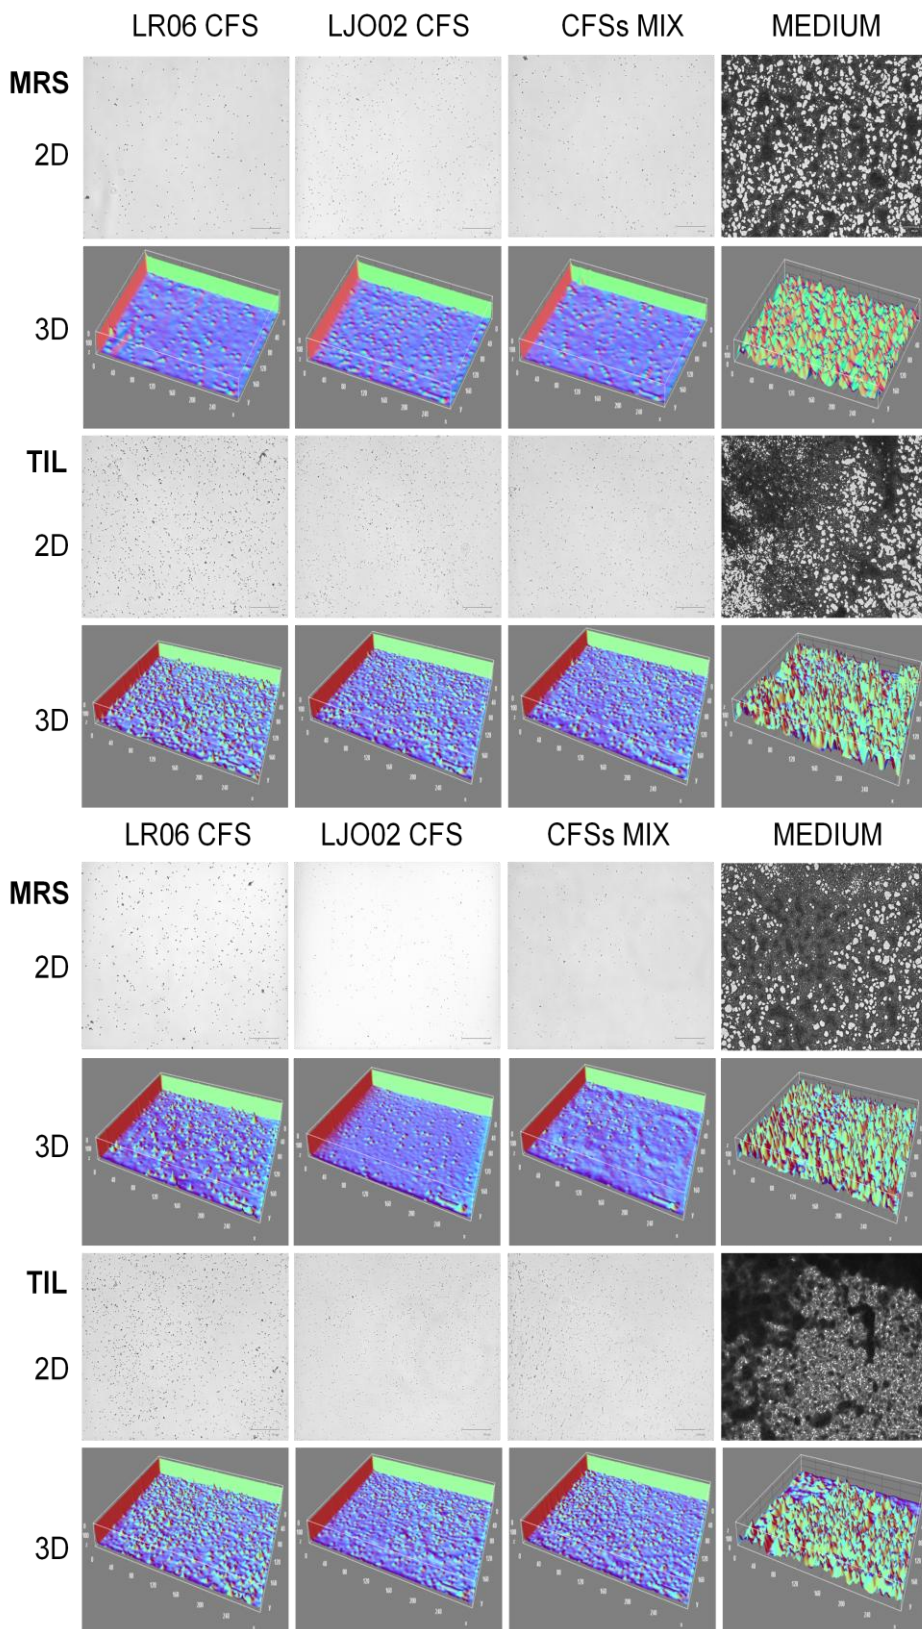

**Supplementary Figure 1S.** CV-stained *S. aureus* biofilm after treatment with CFSs in MRS and TIL. Representative 2D and 3D images of CV-stained *S. aureus* biofilm after 24 h (upper panel) and 48 h (lower panel) of incubation with the CFSs produced in MRS and TIL. 2D pictures magnification: 460 X. Scale bar: 100  $\mu$ m.

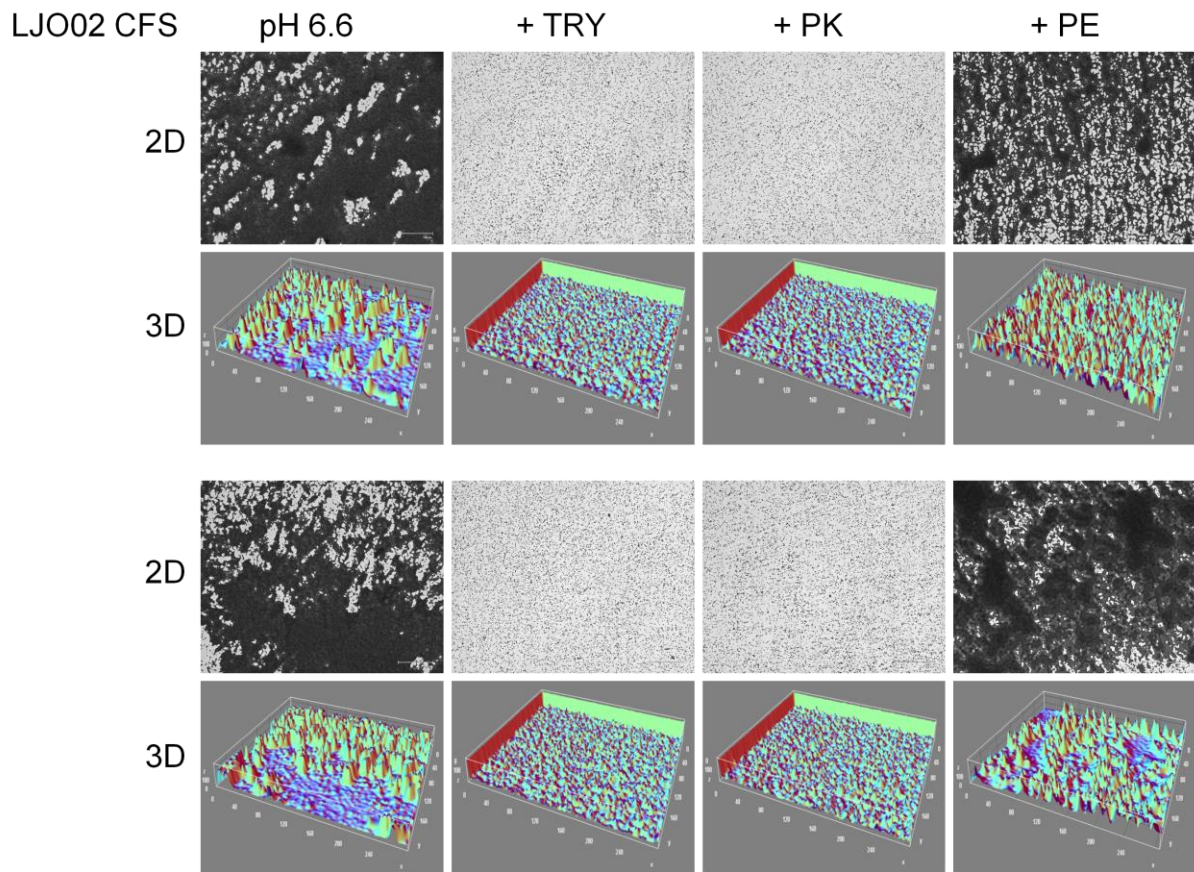

**Supplementary Figure 2S.** CV-stained *S. aureus* biofilm after treatment with LJO02 CFSs produced in TIL with adjusted pH or treated with proteolytic enzymes. Representative 2D and 3D images of CV-stained *S. aureus* biofilm after 24 h (upper panel) and 48 h (lower panel) of incubation with the modified CFSs. 2D picture magnification: 460 X. Scale bar: 100  $\mu\text{m}$ .
